# Supplementary material for: Suicidal Behavior and Its Relationship with Postmortem Forensic Toxicological Findings
Source: MDPI journal article supplement (doi:10.3390/toxics10060319), 2022-06-11
Supplement: s1 [file s1]

---

# Supplementary Materials: Suicidal Behavior and Its Relationship with Postmortem Forensic Toxicological Findings

Aurelia Collados-Ros, Carmen Torres-Sánchez, María D Pérez-Cárceles, Aurelio Luna and Isabel Legaz

1

[illegible]

[illegible]
